# Supplementary material
Source: MDPI journal article supplement (https://www.mdpi.com/2079-6439/12/5/41)
Supplement: s1 [file s1]

|                | Power: 20 W |                 | Power: 60 W |                 | Power: 100 W |                 |
|----------------|-------------|-----------------|-------------|-----------------|--------------|-----------------|
|                | Length [m]  | Resistance [MΩ] | Length [m]  | Resistance [MΩ] | Length [m]   | Resistance [MΩ] |
| Speed: 5 mm/s  | 0.1         | 6.613           | 0.1         | 6.668           | 0.1          | 5.851           |
|                |             | 5.946           |             | 6.666           |              | 5.839           |
|                |             | 6.769           |             | 6.811           |              | 5.764           |
|                |             | 6.383           |             | 6.581           |              | 5.937           |
|                |             | 6.712           |             | 6.467           |              |                 |
|                | 0.15        | 9.773           | 0.15        | 8.962           | 0.15         | 10.284          |
|                |             | 9.802           |             | 9.544           |              | 10.329          |
|                |             | 10.889          |             | 9.599           |              | 10.148          |
|                |             | 10.025          |             | 10.127          |              | 10.782          |
|                |             |                 |             |                 |              | 10.733          |
|                | 0.2         | 13.582          | 0.2         | 14.199          | 0.2          | 13.221          |
|                |             | 14.024          |             | 13.502          |              | 13.735          |
|                |             | 13.221          |             | 13.205          |              | 14.147          |
|                |             | 13.378          |             | 14.487          |              | 13.785          |
|                |             | 13.527          |             |                 |              |                 |
| Speed: 25 mm/s | 0.1         | 7.386           | 0.1         | 7.190           | 0.1          | 7.129           |
|                |             | 6.699           |             | 6.784           |              | 7.320           |
|                |             | 7.100           |             | 6.391           |              | 7.262           |
|                |             | 10.100          |             | 7.587           |              | 6.756           |
|                |             | 8.159           |             | 10.241          |              | 7.509           |
|                | 0.15        | 9.730           | 0.15        | 9.753           | 0.15         | 9.985           |
|                |             | 9.795           |             | 9.869           |              | 10.458          |
|                |             | 10.127          |             | 9.793           |              | 9.357           |
|                |             | 9.444           |             | 9.044           |              | 10.952          |
|                |             | 10.069          |             | 9.561           |              | 9.969           |
|                | 0.2         | 13.201          | 0.2         | 13.170          | 0.2          | 18.169          |
|                |             | 14.844          |             | 12.193          |              | 23.251          |
|                |             | 13.343          |             | 13.106          |              | 20.027          |
|                |             | 12.877          |             | 12.797          |              |                 |
|                |             |                 |             | 12.958          |              |                 |
| Speed: 50 mm/s |             |                 | 0.1         | 6.325           | 0.1          | 7.646           |
|                |             |                 |             | 6.235           |              | 7.305           |
|                |             |                 |             | 7.378           |              | 6.509           |
|                |             |                 |             | 6.855           |              | 6.990           |
|                |             |                 |             | 7.094           |              | 6.653           |
|                |             |                 | 0.15        | 10.185          | 0.15         | 10.583          |
|                |             |                 |             | 10.261          |              | 10.181          |
|                |             |                 |             | 10.424          |              | 9.687           |
|                |             |                 |             | 10.240          |              | 10.069          |
|                |             |                 | 0.2         | 14.101          | 0.2          | 9.902           |
|                |             |                 |             | 13.970          |              | 16.027          |
|                |             |                 |             | 12.909          |              | 15.767          |
|                |             |                 |             | 17.512          |              | 15.751          |
|                |             |                 |             | 13.241          |              | 15.539          |
|                |             |                 |             |                 |              | 15.708          |
